# Supplementary material for: Stepped, Collaborative, Coordinated Care for Somatic Symptom and Related Disorders (Sofu-Net)
Source: Atypon-hosted journal article supplement (doi:10.1027/2151-2604/a000405), 2020-05-01
Supplement: 2151-2604_a000405_esm1.pdf [file 2151-2604_a000405_esm1.pdf]

## ***Electronic Supplementary Material***

### **Stepped, collaborative, coordinated care for somatic symptom and related disorders (Sofu-Net) - A mixed-methods evaluation among health care professionals**

*Meike C. Shedden-Mora\*, Amina Kuby, Justus Tönnies, Katharina Piontek, & Bernd Löwe<sup>a</sup>*

#### **\*Corresponding author**

Meike C. Shedden-Mora, PhD

Department of Psychosomatic Medicine and Psychotherapy

University Medical Center Hamburg-Eppendorf

Martinstraße 52

20246 Hamburg, Germany

Phone: +49-40-7410-54323

Fax: +49-40-7410-54975

E-mail: m.shedden-mora@uke.de

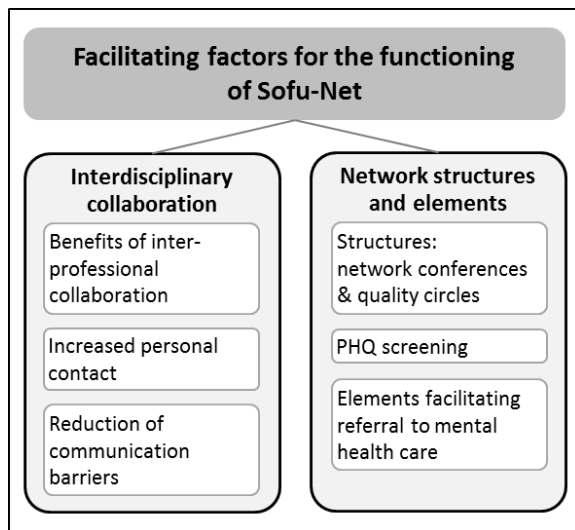

**Figure S2: Facilitating factors for the successful functioning of Sofu-Net: main themes and subthemes of qualitative analysis**

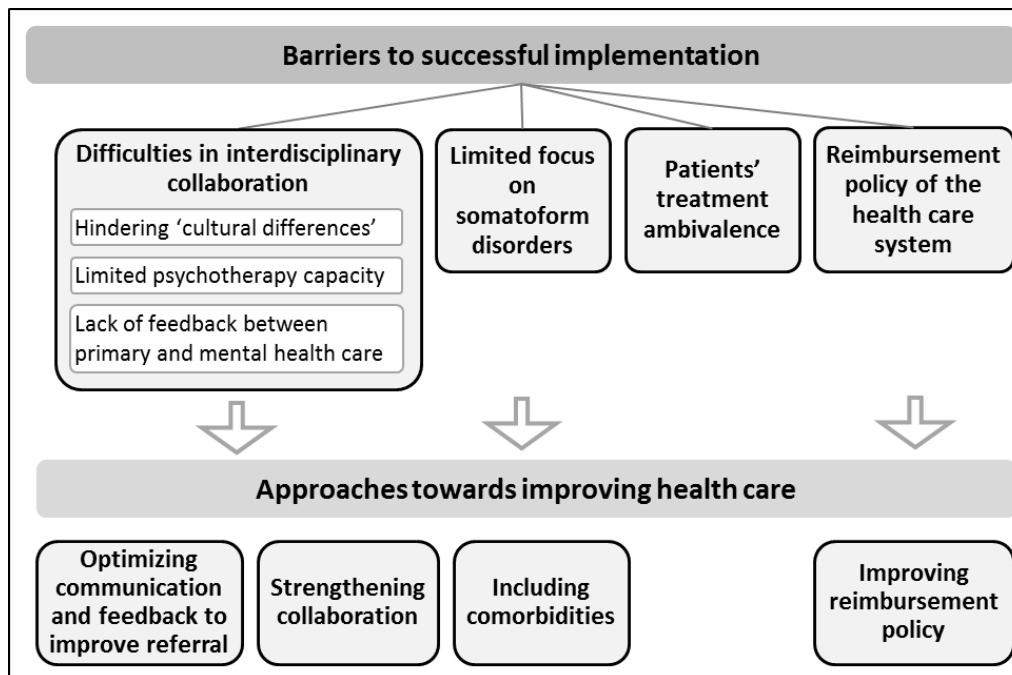

Figure S3: Barriers to successful implementation and approaches towards improving health care networks for SSRD: main themes and subthemes of qualitative analysis
